# Supplementary material for: Integrating Mental Health and Psycho-Social Support (MHPSS) into infectious disease outbreak and epidemic response: an umbrella review and operational framework
Source: bioRxiv or medRxiv preprint supplement (doi:10.1101/2023.07.27.23293219), 2023-07-28
Supplement: Supplementary file [file media-1.pdf]

|                               | Quality appraisal of the systematic review - JBI 2020 checklist |                                                           |                                         |                                                                        |                                                          |                                                              |                                                              |                                                          |                                                     |                                                     |                                                                |             |                  |
|-------------------------------|-----------------------------------------------------------------|-----------------------------------------------------------|-----------------------------------------|------------------------------------------------------------------------|----------------------------------------------------------|--------------------------------------------------------------|--------------------------------------------------------------|----------------------------------------------------------|-----------------------------------------------------|-----------------------------------------------------|----------------------------------------------------------------|-------------|------------------|
|                               | 1. Is the review question clearly and explicitly stated?        | 2. Were the inclusion criteria appropriate for the review | 3. Was the search strategy appropriate? | 4. Were the sources and resources used to search for studies adequate? | 5. Were the criteria for appraising studies appropriate? | 6. Was critical appraisal conducted by two or more reviewers | 7. Were there methods to minimize errors in data extraction? | 8. Were the methods used to combine studies appropriate? | 9. Was the likelihood of publication bias assessed? | 10. Were recommendations for policy and/or practice | 11. Were the specific directives for new research appropriate? | Total score | Total Quality    |
| Author, Year                  |                                                                 |                                                           |                                         |                                                                        |                                                          |                                                              |                                                              |                                                          |                                                     |                                                     |                                                                |             |                  |
| (Bertuzzi et al., 2021)       | 1                                                               | 1                                                         | 1                                       | 1                                                                      | 1                                                        | 1                                                            | 1                                                            | 0                                                        | 0                                                   | 1                                                   | 1                                                              | 9           | High quality     |
| (Bursky et al., 2021)         | 1                                                               | 1                                                         | 0                                       | 1                                                                      | 1                                                        | 1                                                            | 0                                                            | 0                                                        | 0                                                   | 1                                                   | 1                                                              | 7           | Moderate quality |
| (Cénat, Felix, et al., 2020)  | 1                                                               | 1                                                         | 1                                       | 1                                                                      | 0                                                        | 0                                                            | 0                                                            | 0                                                        | 0                                                   | 1                                                   | 0                                                              | 5           | Low quality      |
| (Damiano et al., 2021)        | 1                                                               | 0                                                         | 1                                       | 1                                                                      | 1                                                        | 1                                                            | 0                                                            | 1                                                        | 0                                                   | 1                                                   | 0                                                              | 7           | Moderate quality |
| (Davison et al., 2021)        | 1                                                               | 1                                                         | 1                                       | 1                                                                      | 1                                                        | 0                                                            | 0                                                            | 0                                                        | 0                                                   | 1                                                   | 1                                                              | 7           | Moderate quality |
| (Ding et al., 2021)           | 1                                                               | 1                                                         | 1                                       | 1                                                                      | 1                                                        | 1                                                            | 0                                                            | 1                                                        | 1                                                   | 0                                                   | 1                                                              | 9           | High quality     |
| (Doherty et al., 2021)        | 1                                                               | 1                                                         | 1                                       | 1                                                                      | 1                                                        | 1                                                            | 1                                                            | 1                                                        | 0                                                   | 1                                                   | 1                                                              | 10          | High quality     |
| (Gómez et al., 2021)          | 1                                                               | 1                                                         | 1                                       | 0                                                                      | 0                                                        | 0                                                            | 0                                                            | 0                                                        | 0                                                   | 1                                                   | 0                                                              | 4           | Low quality      |
| (Hooper et al., 2021)         | 1                                                               | 1                                                         | 1                                       | 1                                                                      | 0                                                        | 0                                                            | 0                                                            | 0                                                        | 0                                                   | 1                                                   | 0                                                              | 5           | low quality      |
| (Kunzler et al., 2021)        | 1                                                               | 1                                                         | 1                                       | 1                                                                      | 0                                                        | 0                                                            | 1                                                            | 0                                                        | 0                                                   | 1                                                   | 1                                                              | 7           | Moderate quality |
| (Meherali et al., 2021)       | 1                                                               | 1                                                         | 1                                       | 1                                                                      | 1                                                        | 0                                                            | 1                                                            | 0                                                        | 0                                                   | 1                                                   | 1                                                              | 8           | Moderate quality |
| (Pollock et al., 2020)        | 1                                                               | 1                                                         | 1                                       | 1                                                                      | 1                                                        | 1                                                            | 1                                                            | 0                                                        | 0                                                   | 1                                                   | 1                                                              | 9           | High quality     |
| (Puyat et al., 2020)          | 1                                                               | 1                                                         | 1                                       | 1                                                                      | 1                                                        | 0                                                            | 0                                                            | 0                                                        | 0                                                   | 1                                                   | 1                                                              | 7           | Moderate quality |
| (Rivera-Torres et al., 2021)  | 1                                                               | 0                                                         | 1                                       | 1                                                                      | 0                                                        | 0                                                            | 0                                                            | 0                                                        | 0                                                   | 0                                                   | 0                                                              | 3           | Low quality      |
| (Serrano-Ripoll et al., 2020) | 1                                                               | 1                                                         | 1                                       | 1                                                                      | 1                                                        | 0                                                            | 1                                                            | 1                                                        | 1                                                   | 1                                                   | 1                                                              | 10          | High quality     |
| (Shatri et al., 2021)         | 0                                                               | 1                                                         | 1                                       | 1                                                                      | 1                                                        | 1                                                            | 0                                                            | 0                                                        | 0                                                   | 0                                                   | 0                                                              | 5           | Low quality      |
| (Soklaridis et al., 2020)     | 1                                                               | 1                                                         | 1                                       | 1                                                                      | 1                                                        | 1                                                            | 0                                                            | 0                                                        | 0                                                   | 0                                                   | 1                                                              | 7           | Moderate quality |
| (Strudwick et al., 2021)      | 1                                                               | 1                                                         | 1                                       | 1                                                                      | 0                                                        | 0                                                            | 0                                                            | 0                                                        | 0                                                   | 1                                                   | 1                                                              | 6           | Moderate quality |
| (Sun et al., 2021)            | 1                                                               | 1                                                         | 1                                       | 1                                                                      | 0                                                        | 1                                                            | 0                                                            | 1                                                        | 0                                                   | 0                                                   | 1                                                              | 7           | Moderate quality |
| (Williams et al., 2021)       | 1                                                               | 1                                                         | 1                                       | 1                                                                      | 1                                                        | 1                                                            | 0                                                            | 0                                                        | 0                                                   | 1                                                   | 1                                                              | 8           | Moderate quality |
| (Yang et al., 2021)           | 1                                                               | 1                                                         | 1                                       | 1                                                                      | 1                                                        | 1                                                            | 1                                                            | 1                                                        | 0                                                   | 0                                                   | 0                                                              | 8           | Moderate quality |
| (Yue et al., 2020)            | 1                                                               | 1                                                         | 1                                       | 1                                                                      | 1                                                        | 1                                                            | 0                                                            | 0                                                        | 0                                                   | 1                                                   | 1                                                              | 8           | Moderate quality |
| (Zaçe et al., 2021)           | 1                                                               | 0                                                         | 1                                       | 1                                                                      | 0                                                        | 1                                                            | 0                                                            | 0                                                        | 0                                                   | 1                                                   | 1                                                              | 6           | Moderate quality |
